# Supplementary material for: Finite-field Cholesky decomposed coupled-cluster techniques (ff-CD-CC): theory and application to pressure broadening of Mg by a He atmosphere and a strong magnetic field
Source: Royal Society of Chemistry journal article supplement (doi:10.1039/d4cp03103b), 2024-01-01
Supplement: d4cp03103b1.pdf [file d4cp03103b1.pdf]

# Supporting Information: Finite-Field Cholesky Decomposed Coupled-Cluster Techniques (ff-CD-CC): Theory and Application to Pressure Broadening of Mg by a He Atmosphere and a Strong Magnetic Field

Simon Blaschke,<sup>\*,†,‡</sup> Marios-Petros Kitsaras,<sup>\*,¶</sup> and Stella Stopkowicz<sup>\*,¶,§</sup>

<sup>†</sup>*Department Chemie, Johannes Gutenberg-Universität Mainz, Duesbergweg 10-14, D-55128  
Mainz, Germany*

<sup>‡</sup>*Fachrichtung Chemie, Universität des Saarlandes, Campus B2.2, D-66123 Saarbrücken,  
Germany*

<sup>¶</sup>*Fachrichtung Chemie, Universität des Saarlandes, D-66123 Saarbrücken, Germany*

<sup>§</sup>*Hylleraas Centre for Quantum Molecular Sciences, Department of Chemistry, University  
of Oslo, P.O. Box 1033, N-0315 Oslo, Norway*

E-mail: [siblasch@uni-mainz.de](mailto:siblasch@uni-mainz.de); [marios.kitsaras@uni-saarland.de](mailto:marios.kitsaras@uni-saarland.de);  
[stella.stopkowicz@uni-saarland.de](mailto:stella.stopkowicz@uni-saarland.de)

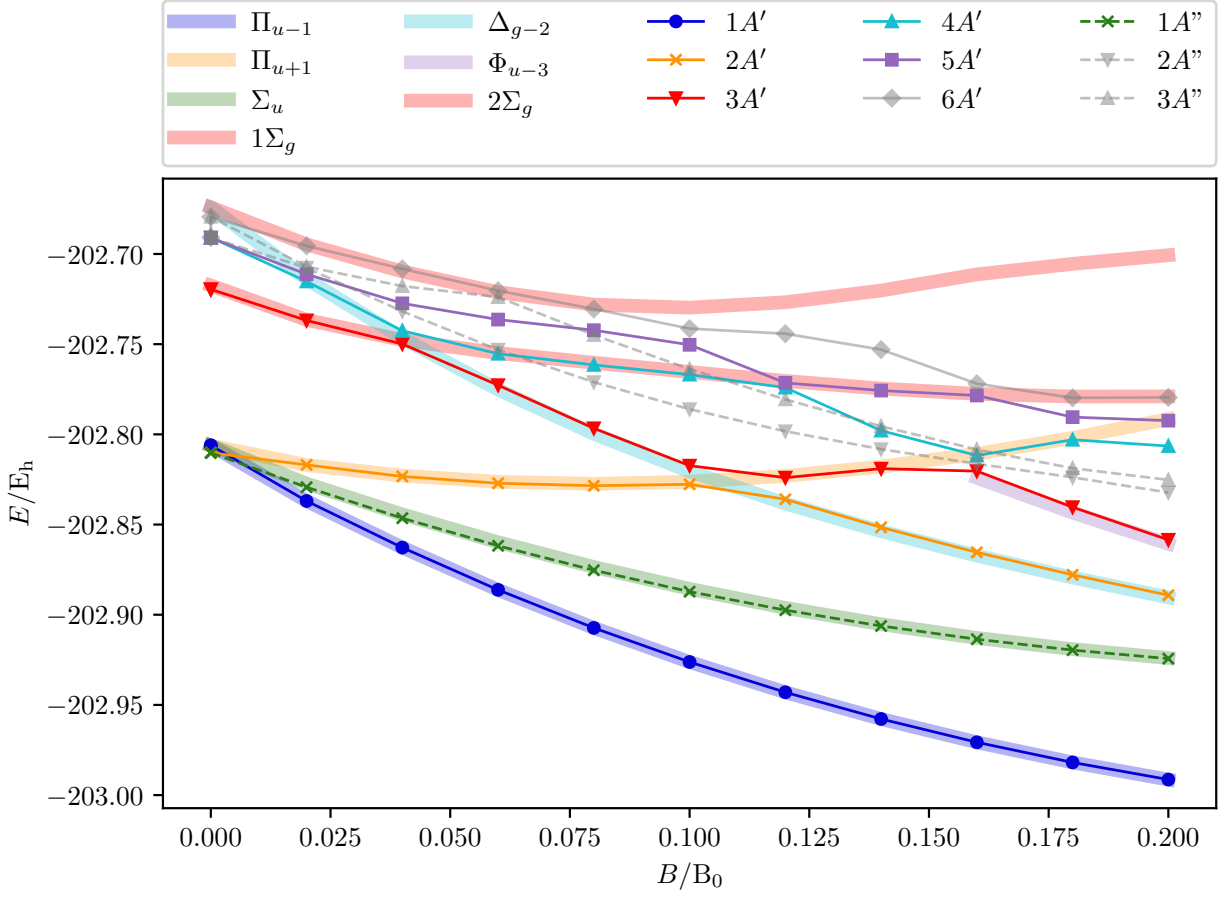

Figure S1: Depiction of the ground and excited states of MgHe in a perpendicular magnetic field ( $C_s$ ). As a guideline of the evolution of the states in the isolated Mg atom ( $SO(3)$ ) the respective states are shown as broad lines. Note that they were shifted by the energy of the helium atom so that the ground state coincides.

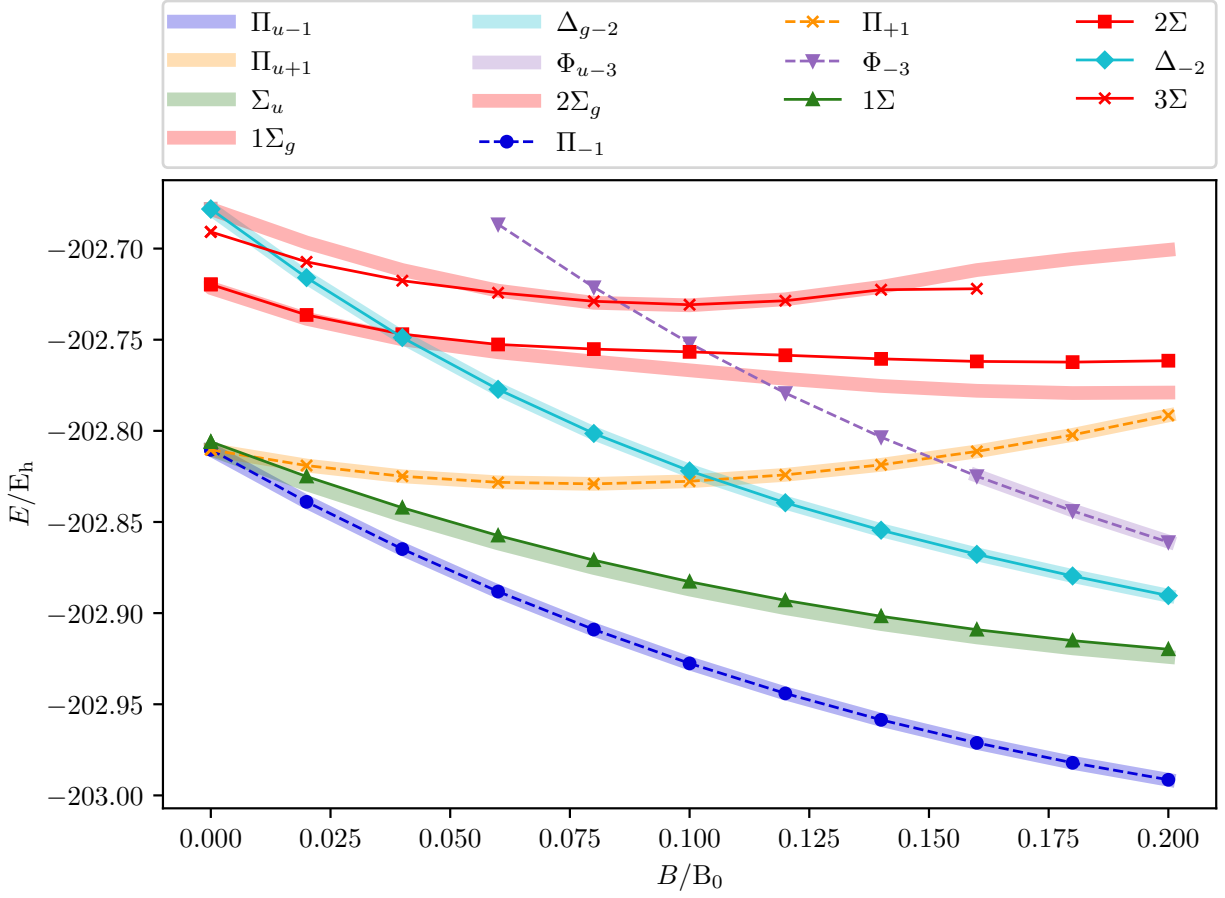

Figure S2: Depiction of the ground and excited states of MgHe in a parallel magnetic field ( $C_\infty$ ). As a guideline of the evolution of the states in the isolated Mg atom ( $SO(3)$ ) the respective states are shown as broad lines. Note that they were shifted by the energy of the helium atom so that the ground state coincides.

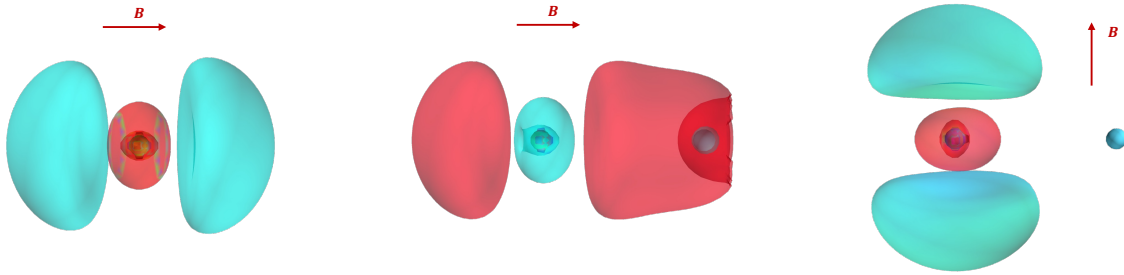

Figure S3: Depiction of the HOMO (4s in the field-free case) of the final state for the  ${}^3P$  to  ${}^3S$  transition of the Mg triplet atom (left) in a magnetic field and for MgHe with the magnetic field parallel (center) and perpendicular (right) to the bond axis. Calculated at  $B=0.1 B_0$  as an isosurface plot of  $0.015 a_0^{-3}$ .

Table S1: EOM-CCSD excitation energy  $E_{\text{exc}}$  of the MgHe dimer at  $3.5 \text{ \AA}$  bond distance. The basis set on Mg was chosen to be unc-aug-cc-pCVQZ while the basis on He was varied. The difference in the transition wavelength  $\Delta\lambda$  with respect to the d-aug-cc-pVQZ is given additionally.

| Basis on He       | $E_{\text{exc}}/E_{\text{h}}$ | $\Delta E_{\text{exc}}/E_{\text{h}}$ | $\Delta\lambda/\text{\AA}$ |
|-------------------|-------------------------------|--------------------------------------|----------------------------|
| unc-6-31G         | $9.097\,78 \times 10^{-2}$    | $3.1 \times 10^{-4}$                 | 16.95                      |
| unc-cc-pVDZ       | $9.093\,17 \times 10^{-2}$    | $2.6 \times 10^{-4}$                 | 14.41                      |
| unc-aug-cc-pVDZ   | $9.073\,52 \times 10^{-2}$    | $6.4 \times 10^{-5}$                 | 3.55                       |
| unc-aug-cc-pVTZ   | $9.069\,67 \times 10^{-2}$    | $2.6 \times 10^{-5}$                 | 1.42                       |
| unc-aug-cc-pVQZ   | $9.068\,80 \times 10^{-2}$    | $1.7 \times 10^{-5}$                 | 0.94                       |
| unc-d-aug-cc-pVQZ | $9.067\,11 \times 10^{-2}$    | 0.00                                 | 0.00                       |

Table S2: Mean error of the ff-CD-HF energy, ff-CD-CCSD/CC2 correlation energy and the ff-CD-EOM-CCSD/CC2 excitation energy as a function of the Cholesky parameter  $\delta$ . The convergence criteria for HF, CCSD as well as EOM were set to  $10^{-7}$ .

| $\delta$ | $\Delta E_{\text{HF}}/E_h$ | $\Delta E_{\text{CCSD}}/E_h$ | $\Delta E_{\text{EOM-CCSD}}/E_h$ | $\Delta E_{\text{CC2}}/E_h$ | $\Delta E_{\text{EOM-CC2}}/E_h$ |
|----------|----------------------------|------------------------------|----------------------------------|-----------------------------|---------------------------------|
| 1        | $3.7 \times 10^{-2}$       | $2.9 \times 10^{-2}$         | $2.1 \times 10^{-2}$             | $2.3 \times 10^{-2}$        | $1.2 \times 10^{-2}$            |
| 2        | $9.0 \times 10^{-4}$       | $2.5 \times 10^{-4}$         | $1.9 \times 10^{-4}$             | $5.2 \times 10^{-4}$        | $2.2 \times 10^{-4}$            |
| 3        | $1.8 \times 10^{-5}$       | $6.7 \times 10^{-6}$         | $6.3 \times 10^{-6}$             | $2.1 \times 10^{-5}$        | $5.8 \times 10^{-6}$            |
| 4        | $1.6 \times 10^{-6}$       | $2.9 \times 10^{-7}$         | $5.2 \times 10^{-7}$             | $9.5 \times 10^{-7}$        | $4.0 \times 10^{-7}$            |
| 5        | $6.4 \times 10^{-7}$       | $9.0 \times 10^{-8}$         | $6.5 \times 10^{-8}$             | $1.8 \times 10^{-7}$        | $5.7 \times 10^{-8}$            |
| 6        | $4.7 \times 10^{-8}$       | $8.6 \times 10^{-9}$         | $1.4 \times 10^{-8}$             | $1.6 \times 10^{-8}$        | $1.2 \times 10^{-8}$            |
| 7        | $1.3 \times 10^{-8}$       | $3.5 \times 10^{-9}$         | $2.0 \times 10^{-9}$             | $4.2 \times 10^{-9}$        | $3.4 \times 10^{-9}$            |
| 8        | $9.3 \times 10^{-10}$      | $2.6 \times 10^{-9}$         | $6.4 \times 10^{-10}$            | $3.0 \times 10^{-9}$        | $2.5 \times 10^{-9}$            |
| 9        | $5.3 \times 10^{-11}$      | $2.6 \times 10^{-9}$         | $3.6 \times 10^{-10}$            | $3.0 \times 10^{-9}$        | $2.3 \times 10^{-9}$            |
| 10       | 0.0                        | $2.6 \times 10^{-9}$         | $3.4 \times 10^{-10}$            | $3.0 \times 10^{-9}$        | $2.3 \times 10^{-9}$            |

Table S3: The transition wavelength  $\lambda$  ( ${}^3\Pi \rightarrow {}^3\Sigma^+$ ) as well as the total initial state energy  $E_{\text{tot}}$  as a function of the Mg-He distance  $R$ . Calculated with CD-CCSD ( $\delta = 5$ ) using the unc-aug-cc-pCVQZ basis for Mg and the unc-aug-cc-pVDZ basis for He.

| $R/\text{\AA}$ | $\lambda/\text{\AA}$ | $E_{\text{tot}}/E_h$ |
|----------------|----------------------|----------------------|
| 2.00           | 5196.55              | -202.803197          |
| 2.50           | 5104.26              | -202.808283          |
| 3.00           | 5040.01              | -202.809948          |
| 3.50           | 5024.26              | -202.810382          |
| 4.00           | 5034.37              | -202.810435          |
| 4.50           | 5054.82              | -202.810408          |
| 5.00           | 5076.51              | -202.810375          |
| 5.50           | 5094.98              | -202.810353          |
| 6.00           | 5108.79              | -202.810341          |
| 6.50           | 5118.24              | -202.810334          |
| 7.00           | 5124.27              | -202.810330          |
| 7.50           | 5127.92              | -202.810328          |
| 8.00           | 5130.04              | -202.810327          |
| 8.50           | 5131.22              | -202.810326          |
| 9.00           | 5131.85              | -202.810325          |
| 9.50           | 5132.17              | -202.810325          |
| 10.00          | 5132.32              | -202.810325          |
| 10.50          | 5132.38              | -202.810325          |
| 11.00          | 5132.40              | -202.810324          |
| 11.50          | 5132.40              | -202.810324          |
| 12.00          | 5132.40              | -202.810324          |
| 12.50          | 5132.39              | -202.810324          |
| 13.00          | 5132.38              | -202.810324          |
| 13.50          | 5132.38              | -202.810324          |
| 14.00          | 5132.37              | -202.810324          |
| 14.50          | 5132.37              | -202.810324          |
| 15.00          | 5132.37              | -202.810324          |

Table S4: Total energy  $E_{\text{tot}}$  of the initial and first two final states of the MgHe triplet dimer without an external magnetic field and within an finite magnetic field of  $0.05 B_0$  oriented parallel and perpendicular with respect to the Mg-He axis. The calculations were performed at the unc-aug-cc-pVTZ/CC3 level of theory.

| $B = 0$        |                                  |                                  |                                  |
|----------------|----------------------------------|----------------------------------|----------------------------------|
| $R/\text{\AA}$ | $E_{\text{tot}}(^3\Sigma^+)/E_h$ | $E_{\text{tot}}(^3\Pi_{-1})/E_h$ | $E_{\text{tot}}(^3\Pi_{+1})/E_h$ |
| 3.0            | -202.621464                      | -202.631647                      | -202.631647                      |
| 3.5            | -202.627884                      | -202.632085                      | -202.632085                      |
| 4.0            | -202.630494                      | -202.632140                      | -202.632140                      |
| 4.5            | -202.631507                      | -202.632121                      | -202.632121                      |
| 5.0            | -202.631881                      | -202.632097                      | -202.632097                      |
| 5.5            | -202.632011                      | -202.632079                      | -202.632079                      |
| 6.0            | -202.632052                      | -202.632068                      | -202.632068                      |
| 6.5            | -202.632062                      | -202.632062                      | -202.632062                      |
| 7.0            | -202.632064                      | -202.632058                      | -202.632058                      |
| 7.5            | -202.632063                      | -202.632056                      | -202.632056                      |
| 8.0            | -202.632061                      | -202.632055                      | -202.632055                      |
| $B \parallel$  |                                  |                                  |                                  |
| $R/\text{\AA}$ | $E_{\text{tot}}(^3\Sigma)/E_h$   | $E_{\text{tot}}(^3\Pi_{-1})/E_h$ | $E_{\text{tot}}(^3\Pi_{+1})/E_h$ |
| 3.0            | -202.665333                      | -202.698023                      | -202.648026                      |
| 3.5            | -202.671842                      | -202.698480                      | -202.648483                      |
| 4.0            | -202.674479                      | -202.698543                      | -202.648545                      |
| 4.5            | -202.675498                      | -202.698527                      | -202.648529                      |
| 5.0            | -202.675872                      | -202.698505                      | -202.648507                      |
| 5.5            | -202.676001                      | -202.698488                      | -202.648490                      |
| 6.0            | -202.676041                      | -202.698477                      | -202.648479                      |
| 6.5            | -202.676052                      | -202.698471                      | -202.648473                      |
| 7.0            | -202.676053                      | -202.698467                      | -202.648469                      |
| 7.5            | -202.676052                      | -202.698465                      | -202.648467                      |
| 8.0            | -202.676050                      | -202.698464                      | -202.648466                      |
| $B \perp$      |                                  |                                  |                                  |
| $R/\text{\AA}$ | $E_{\text{tot}}(^3A')/E_h$       | $E_{\text{tot}}(^3A'')/E_h$      | $E_{\text{tot}}(^3A')/E_h$       |
| 3.00           | -202.693170                      | -202.675735                      | -202.644368                      |
| 3.50           | -202.696482                      | -202.676114                      | -202.647151                      |
| 4.00           | -202.697802                      | -202.676144                      | -202.648083                      |
| 4.50           | -202.698275                      | -202.676116                      | -202.648380                      |
| 5.00           | -202.698427                      | -202.676089                      | -                                |
| 5.50           | -202.698467                      | -202.676071                      | -202.648481                      |
| 6.00           | -202.698473                      | -202.676061                      | -202.648479                      |
| 6.50           | -202.698471                      | -202.676055                      | -202.648474                      |
| 7.00           | -202.698468                      | -202.676051                      | -202.648470                      |
| 7.50           | -202.698466                      | -202.676050                      | -202.648468                      |
| 8.00           | -202.698464                      | -202.676048                      | -202.648466                      |

Table S5: The counterpoise corrected CCSD interaction energy of the initial state of the MgHe triplet dimer as a function of the external magnetic field strength in a parallel orientation respectively. The calculations were performed using the unc-aug-cc-pCVQZ basis for Mg and the unc-aug-cc-pVDZ basis for He.

| $R/\text{\AA}$ | $B = 0.0 B_0$<br>$E_{\text{int}}/E_h$ | $B = 0.05 B_0$<br>$E_{\text{int}}/E_h$ | $B = 0.10 B_0$<br>$E_{\text{int}}/E_h$ | $B = 0.15 B_0$<br>$E_{\text{int}}/E_h$ | $B = 0.20 B_0$<br>$E_{\text{int}}/E_h$ |
|----------------|---------------------------------------|----------------------------------------|----------------------------------------|----------------------------------------|----------------------------------------|
| 3.0            | $5.300 \times 10^{-4}$                | $5.508 \times 10^{-4}$                 | $5.960 \times 10^{-4}$                 | $6.562 \times 10^{-4}$                 | $7.271 \times 10^{-4}$                 |
| 3.5            | $2.016 \times 10^{-5}$                | $2.891 \times 10^{-5}$                 | $4.669 \times 10^{-5}$                 | $6.869 \times 10^{-5}$                 | $9.371 \times 10^{-5}$                 |
| 3.6            | $-1.458 \times 10^{-5}$               | $-7.147 \times 10^{-6}$                | $7.775 \times 10^{-6}$                 | $2.591 \times 10^{-5}$                 | $4.630 \times 10^{-5}$                 |
| 3.7            | $-3.782 \times 10^{-5}$               | $-3.148 \times 10^{-5}$                | $-1.889 \times 10^{-5}$                | $-3.865 \times 10^{-6}$                | $1.279 \times 10^{-5}$                 |
| 3.8            | $-5.249 \times 10^{-5}$               | $-4.705 \times 10^{-5}$                | $-3.637 \times 10^{-5}$                | $-2.387 \times 10^{-5}$                | $-1.023 \times 10^{-5}$                |
| 3.9            | $-6.087 \times 10^{-5}$               | $-5.618 \times 10^{-5}$                | $-4.708 \times 10^{-5}$                | $-3.662 \times 10^{-5}$                | $-2.541 \times 10^{-5}$                |
| 4.0            | $-6.473 \times 10^{-5}$               | $-6.068 \times 10^{-5}$                | $-5.288 \times 10^{-5}$                | $-4.409 \times 10^{-5}$                | $-3.484 \times 10^{-5}$                |
| 4.1            | $-6.543 \times 10^{-5}$               | $-6.191 \times 10^{-5}$                | $-5.520 \times 10^{-5}$                | $-4.777 \times 10^{-5}$                | $-4.012 \times 10^{-5}$                |
| 4.2            | $-6.399 \times 10^{-5}$               | $-6.092 \times 10^{-5}$                | $-5.512 \times 10^{-5}$                | $-4.881 \times 10^{-5}$                | $-4.245 \times 10^{-5}$                |
| 4.3            | $-6.116 \times 10^{-5}$               | $-5.847 \times 10^{-5}$                | $-5.344 \times 10^{-5}$                | $-4.805 \times 10^{-5}$                | $-4.274 \times 10^{-5}$                |
| 4.4            | $-5.748 \times 10^{-5}$               | $-5.513 \times 10^{-5}$                | $-5.075 \times 10^{-5}$                | $-4.613 \times 10^{-5}$                | $-4.168 \times 10^{-5}$                |
| 4.5            | $-5.337 \times 10^{-5}$               | $-5.130 \times 10^{-5}$                | $-4.747 \times 10^{-5}$                | $-4.350 \times 10^{-5}$                | $-3.975 \times 10^{-5}$                |
| 4.6            | $-4.909 \times 10^{-5}$               | $-4.727 \times 10^{-5}$                | $-4.391 \times 10^{-5}$                | $-4.049 \times 10^{-5}$                | $-3.730 \times 10^{-5}$                |
| 4.7            | $-4.484 \times 10^{-5}$               | $-4.323 \times 10^{-5}$                | $-4.028 \times 10^{-5}$                | $-3.731 \times 10^{-5}$                | $-3.460 \times 10^{-5}$                |
| 4.8            | $-4.074 \times 10^{-5}$               | $-3.931 \times 10^{-5}$                | $-3.672 \times 10^{-5}$                | $-3.414 \times 10^{-5}$                | $-3.182 \times 10^{-5}$                |
| 4.9            | $-3.687 \times 10^{-5}$               | $-3.561 \times 10^{-5}$                | $-3.332 \times 10^{-5}$                | $-3.107 \times 10^{-5}$                | $-2.907 \times 10^{-5}$                |
| 5.0            | $-3.327 \times 10^{-5}$               | $-3.215 \times 10^{-5}$                | $-3.014 \times 10^{-5}$                | $-2.816 \times 10^{-5}$                | $-2.643 \times 10^{-5}$                |
| 5.5            | $-1.956 \times 10^{-5}$               | $-1.893 \times 10^{-5}$                | $-1.782 \times 10^{-5}$                | $-1.677 \times 10^{-5}$                | $-1.587 \times 10^{-5}$                |
| 6.0            | $-1.159 \times 10^{-5}$               | $-1.122 \times 10^{-5}$                | $-1.059 \times 10^{-5}$                | $-9.987 \times 10^{-6}$                | $-9.475 \times 10^{-6}$                |
| 6.5            | $-7.070 \times 10^{-6}$               | $-6.846 \times 10^{-6}$                | $-6.466 \times 10^{-6}$                | $-6.103 \times 10^{-6}$                | $-5.792 \times 10^{-6}$                |
| 7.0            | $-4.465 \times 10^{-6}$               | $-4.323 \times 10^{-6}$                | $-4.082 \times 10^{-6}$                | $-3.851 \times 10^{-6}$                | $-3.652 \times 10^{-6}$                |
| 7.5            | $-2.916 \times 10^{-6}$               | $-2.822 \times 10^{-6}$                | $-2.663 \times 10^{-6}$                | $-2.509 \times 10^{-6}$                | $-2.375 \times 10^{-6}$                |
| 8.0            | $-1.962 \times 10^{-6}$               | $-1.897 \times 10^{-6}$                | $-1.789 \times 10^{-6}$                | $-1.682 \times 10^{-6}$                | $-1.590 \times 10^{-6}$                |

Table S6: The counterpoise corrected CCSD interaction energy of the initial state of the MgHe triplet dimer as a function of the external magnetic field strength in a perpendicular orientation respectively. The calculations were performed using the unc-aug-cc-pCVQZ basis for Mg and the unc-aug-cc-pVDZ basis for He.

| $R/\text{\AA}$ | $B = 0.0 B_0$<br>$E_{\text{int}}/E_h$ | $B = 0.05 B_0$<br>$E_{\text{int}}/E_h$ | $B = 0.10 B_0$<br>$E_{\text{int}}/E_h$ | $B = 0.15 B_0$<br>$E_{\text{int}}/E_h$ | $B = 0.20 B_0$<br>$E_{\text{int}}/E_h$ |
|----------------|---------------------------------------|----------------------------------------|----------------------------------------|----------------------------------------|----------------------------------------|
| 3.0            | $5.300 \times 10^{-4}$                | $5.421 \times 10^{-3}$                 | $4.623 \times 10^{-3}$                 | $3.078 \times 10^{-3}$                 | $1.588 \times 10^{-3}$                 |
| 3.5            | $2.016 \times 10^{-5}$                | $2.048 \times 10^{-3}$                 | $1.424 \times 10^{-3}$                 | $6.667 \times 10^{-4}$                 | $1.132 \times 10^{-4}$                 |
| 3.6            | $-1.458 \times 10^{-5}$               | $1.664 \times 10^{-3}$                 | $1.100 \times 10^{-3}$                 | $4.606 \times 10^{-4}$                 | $2.193 \times 10^{-5}$                 |
| 3.7            | $-3.782 \times 10^{-5}$               | $1.347 \times 10^{-3}$                 | $8.423 \times 10^{-4}$                 | $3.067 \times 10^{-4}$                 | $-3.680 \times 10^{-5}$                |
| 3.8            | $-5.249 \times 10^{-5}$               | $1.085 \times 10^{-3}$                 | $6.384 \times 10^{-4}$                 | $1.936 \times 10^{-4}$                 | $-7.215 \times 10^{-5}$                |
| 3.9            | $-6.087 \times 10^{-5}$               | $8.712 \times 10^{-4}$                 | $4.782 \times 10^{-4}$                 | $1.118 \times 10^{-4}$                 | $-9.112 \times 10^{-5}$                |
| 4.0            | $-6.473 \times 10^{-5}$               | $6.962 \times 10^{-4}$                 | $3.533 \times 10^{-4}$                 | $5.383 \times 10^{-5}$                 | $-9.894 \times 10^{-5}$                |
| 4.1            | $-6.543 \times 10^{-5}$               | $5.538 \times 10^{-4}$                 | $2.566 \times 10^{-4}$                 | $1.384 \times 10^{-5}$                 | $-9.947 \times 10^{-5}$                |
| 4.2            | $-6.399 \times 10^{-5}$               | $4.383 \times 10^{-4}$                 | $1.823 \times 10^{-4}$                 | $-1.284 \times 10^{-5}$                | $-9.547 \times 10^{-5}$                |
| 4.3            | $-6.116 \times 10^{-5}$               | $3.449 \times 10^{-4}$                 | $1.259 \times 10^{-4}$                 | $-2.980 \times 10^{-5}$                | $-8.890 \times 10^{-5}$                |
| 4.4            | $-5.748 \times 10^{-5}$               | $2.697 \times 10^{-4}$                 | $8.331 \times 10^{-5}$                 | $-3.978 \times 10^{-5}$                | $-8.107 \times 10^{-5}$                |
| 4.5            | $-5.337 \times 10^{-5}$               | $2.094 \times 10^{-4}$                 | $5.163 \times 10^{-5}$                 | $-4.484 \times 10^{-5}$                | $-7.285 \times 10^{-5}$                |
| 4.6            | $-4.909 \times 10^{-5}$               | $1.612 \times 10^{-4}$                 | $2.838 \times 10^{-5}$                 | $-4.655 \times 10^{-5}$                | $-6.480 \times 10^{-5}$                |
| 4.7            | $-4.484 \times 10^{-5}$               | $1.228 \times 10^{-4}$                 | $1.159 \times 10^{-5}$                 | $-4.602 \times 10^{-5}$                | $-5.722 \times 10^{-5}$                |
| 4.8            | $-4.074 \times 10^{-5}$               | $9.245 \times 10^{-5}$                 | $-2.602 \times 10^{-7}$                | $-4.408 \times 10^{-5}$                | $-5.029 \times 10^{-5}$                |
| 4.9            | $-3.687 \times 10^{-5}$               | $6.849 \times 10^{-5}$                 | $-8.386 \times 10^{-6}$                | $-4.131 \times 10^{-5}$                | $-4.407 \times 10^{-5}$                |
| 5.0            | $-3.327 \times 10^{-5}$               | $4.970 \times 10^{-5}$                 | $-1.373 \times 10^{-5}$                | $-3.813 \times 10^{-5}$                | $-3.857 \times 10^{-5}$                |
| 5.1            | -                                     | $3.505 \times 10^{-5}$                 | $-1.701 \times 10^{-5}$                | $-3.479 \times 10^{-5}$                | $-3.374 \times 10^{-5}$                |
| 5.2            | -                                     | $2.372 \times 10^{-5}$                 | $-1.880 \times 10^{-5}$                | $-3.150 \times 10^{-5}$                | $-2.954 \times 10^{-5}$                |
| 5.3            | -                                     | $1.503 \times 10^{-5}$                 | $-1.953 \times 10^{-5}$                | $-2.835 \times 10^{-5}$                | $-2.589 \times 10^{-5}$                |
| 5.4            | -                                     | $8.431 \times 10^{-6}$                 | $-1.950 \times 10^{-5}$                | $-2.541 \times 10^{-5}$                | $-2.274 \times 10^{-5}$                |
| 5.5            | $-1.956 \times 10^{-5}$               | $3.478 \times 10^{-6}$                 | $-1.897 \times 10^{-5}$                | $-2.272 \times 10^{-5}$                | $-2.001 \times 10^{-5}$                |
| 5.6            | -                                     | $-1.791 \times 10^{-7}$                | $-1.811 \times 10^{-5}$                | $-2.028 \times 10^{-5}$                | $-1.764 \times 10^{-5}$                |
| 5.7            | -                                     | $-2.825 \times 10^{-6}$                | $-1.706 \times 10^{-5}$                | $-1.809 \times 10^{-5}$                | $-1.560 \times 10^{-5}$                |
| 5.8            | -                                     | $-4.687 \times 10^{-6}$                | $-1.591 \times 10^{-5}$                | $-1.613 \times 10^{-5}$                | $-1.383 \times 10^{-5}$                |
| 5.9            | -                                     | $-5.944 \times 10^{-6}$                | $-1.472 \times 10^{-5}$                | $-1.440 \times 10^{-5}$                | $-1.229 \times 10^{-5}$                |
| 6.0            | $-1.159 \times 10^{-5}$               | $-6.740 \times 10^{-6}$                | $-1.355 \times 10^{-5}$                | $-1.286 \times 10^{-5}$                | $-1.095 \times 10^{-5}$                |
| 6.1            | -                                     | $-7.188 \times 10^{-6}$                | $-1.241 \times 10^{-5}$                | $-1.150 \times 10^{-5}$                | $-9.781 \times 10^{-6}$                |
| 6.2            | -                                     | $-7.376 \times 10^{-6}$                | $-1.134 \times 10^{-5}$                | $-1.030 \times 10^{-5}$                | $-8.757 \times 10^{-6}$                |
| 6.3            | -                                     | $-7.373 \times 10^{-6}$                | $-1.033 \times 10^{-5}$                | $-9.239 \times 10^{-6}$                | $-7.859 \times 10^{-6}$                |
| 6.4            | -                                     | $-7.234 \times 10^{-6}$                | $-9.399 \times 10^{-6}$                | $-8.302 \times 10^{-6}$                | $-7.068 \times 10^{-6}$                |
| 6.5            | $-7.070 \times 10^{-6}$               | $-6.999 \times 10^{-6}$                | $-8.544 \times 10^{-6}$                | $-7.474 \times 10^{-6}$                | $-6.370 \times 10^{-6}$                |
| 7.0            | $-4.465 \times 10^{-6}$               | $-5.271 \times 10^{-6}$                | $-5.307 \times 10^{-6}$                | $-4.538 \times 10^{-6}$                | $-3.897 \times 10^{-6}$                |
| 7.5            | $-2.916 \times 10^{-6}$               | $-3.640 \times 10^{-6}$                | $-3.364 \times 10^{-6}$                | $-2.873 \times 10^{-6}$                | $-2.482 \times 10^{-6}$                |
| 8.0            | $-1.962 \times 10^{-6}$               | $-2.464 \times 10^{-6}$                | $-2.196 \times 10^{-6}$                | $-1.884 \times 10^{-6}$                | $-1.635 \times 10^{-6}$                |



Table S7: Transition wavelength  $\lambda$  of the three former  $P$ -states as a function of the magnetic field strength  $B$ . Three cases are distinguished. The isolated Mg atom is used as a reference ( $C_{\infty h}$ , solid) and is compared with the MgHe triplet dimer at the equilibrium distance in the parallel ( $C_{\infty}$ ) or perpendicular ( $C_s$ ) magnetic field. Calculated with CD-CCSD ( $\delta = 5$ ) using the unc-aug-cc-pCVQZ basis for Mg and the unc-aug-cc-pVDZ basis for He.

| Mg atom            |                                  |                                  |                                  |
|--------------------|----------------------------------|----------------------------------|----------------------------------|
| $B/B_0$            | $\lambda(^3\Pi_u)/\text{\AA}$    | $\lambda(^3\Sigma_u)/\text{\AA}$ | $\lambda(^3\Pi_u)/\text{\AA}$    |
| 0.00               | 5132.4                           | 5132.4                           | 5132.4                           |
| 0.02               | 4539.7                           | 5021.7                           | 5662.3                           |
| 0.04               | 3962.0                           | 4716.5                           | 6065.8                           |
| 0.05               | 3703.6                           | 4532.4                           | 6229.5                           |
| 0.06               | 3472.9                           | 4348.4                           | 6388.4                           |
| 0.08               | 3100.6                           | 4025.6                           | 6791.9                           |
| 0.10               | 2835.0                           | 3790.7                           | 7485.5                           |
| 0.12               | 2641.3                           | 3623.3                           | 8651.0                           |
| 0.14               | 2488.6                           | 3489.5                           | 10532.6                          |
| 0.15               | 2422.0                           | 3428.5                           | 11895.3                          |
| 0.16               | 2360.0                           | 3369.5                           | 13704.1                          |
| 0.18               | 2247.2                           | 3254.9                           | 19852.1                          |
| 0.20               | 2146.1                           | 3143.1                           | 36412.4                          |
| MgHe $B \perp$     |                                  |                                  |                                  |
| $B/B_0$            | $\lambda(^3A')/\text{\AA}$       | $\lambda(^3A'')/\text{\AA}$      | $\lambda(^3A')/\text{\AA}$       |
| 0.00               | 5037.0                           | 5116.8                           | 5037.0                           |
| 0.05               | 3674.1                           | 4459.2                           | 6126.9                           |
| 0.10               | 2841.3                           | 3790.4                           | 7488.6                           |
| 0.15               | 2424.9                           | 3431.1                           | 11886.1                          |
| 0.20               | 2148.0                           | 3146.9                           | 36562.7                          |
| MgHe $B \parallel$ |                                  |                                  |                                  |
| $B/B_0$            | $\lambda(^3\Pi_{-1})/\text{\AA}$ | $\lambda(^3\Sigma)/\text{\AA}$   | $\lambda(^3\Pi_{+1})/\text{\AA}$ |
| 0.00               | 5037.0                           | 5116.8                           | 5037.0                           |
| 0.05               | 3620.3                           | 4471.0                           | 5997.3                           |
| 0.10               | 2713.1                           | 3616.1                           | 6691.8                           |
| 0.15               | 2299.1                           | 3217.7                           | 9421.4                           |
| 0.20               | 2043.9                           | 2952.8                           | 19693.7                          |

Table S8: Shift in the excitation energies  $\Delta E_{\text{exc}}$  induced by the helium atom for the three former  $P$ -states of the MgHe triplet dimer at the equilibrium distance in a parallel ( $C_{\infty}$ ) or perpendicular ( $C_s$ ) magnetic field compared to the isolated Mg atom. For the absolute excitation energies also see tab. S7.

| $B/B_0$ | MgHe $B \perp$                        |                                        |                                       | MgHe $B \parallel$                          |                                           |                                             |
|---------|---------------------------------------|----------------------------------------|---------------------------------------|---------------------------------------------|-------------------------------------------|---------------------------------------------|
|         | $^3A'$<br>$\Delta E_{\text{exc}}/E_h$ | $^3A''$<br>$\Delta E_{\text{exc}}/E_h$ | $^3A'$<br>$\Delta E_{\text{exc}}/E_h$ | $^3\Pi_{-1}$<br>$\Delta E_{\text{exc}}/E_h$ | $^3\Sigma$<br>$\Delta E_{\text{exc}}/E_h$ | $^3\Pi_{+1}$<br>$\Delta E_{\text{exc}}/E_h$ |
| 0.00    | $-1.681 \times 10^{-3}$               | $-2.701 \times 10^{-4}$                | $-1.681 \times 10^{-3}$               | $-1.681 \times 10^{-3}$                     | $-2.701 \times 10^{-4}$                   | $-1.681 \times 10^{-3}$                     |
| 0.05    | $-9.882 \times 10^{-4}$               | $-1.650 \times 10^{-3}$                | $-1.225 \times 10^{-3}$               | $-2.833 \times 10^{-3}$                     | $-1.382 \times 10^{-3}$                   | $-2.834 \times 10^{-3}$                     |
| 0.10    | $3.617 \times 10^{-4}$                | $-1.065 \times 10^{-5}$                | $2.545 \times 10^{-5}$                | $-7.222 \times 10^{-3}$                     | $-5.809 \times 10^{-3}$                   | $-7.223 \times 10^{-3}$                     |
| 0.15    | $2.255 \times 10^{-4}$                | $9.926 \times 10^{-5}$                 | $-2.964 \times 10^{-5}$               | $-1.006 \times 10^{-2}$                     | $-8.712 \times 10^{-3}$                   | $-1.006 \times 10^{-2}$                     |
| 0.20    | $1.811 \times 10^{-4}$                | $1.793 \times 10^{-4}$                 | $5.148 \times 10^{-5}$                | $-1.063 \times 10^{-2}$                     | $-9.343 \times 10^{-3}$                   | $-1.063 \times 10^{-2}$                     |

Table S9: Shift in the transition wavelength and energies  $\Delta\lambda = \lambda(\rho \rightarrow 0) - \lambda(\rho)$  ( $\Delta E_{\text{exc}} = E_{\text{exc}}(\rho \rightarrow 0) - E_{\text{exc}}(\rho)$ ) on CD-CCSD ( $\delta = 5$ ) level of the Mg triplet transition as a function of the helium density  $\rho$  of the MgHe<sub>12</sub> ( $C_{3h}$ ) atmospheric model system in a magnetic field of 3000 T oriented along the  $C_3$  axis. Employing the unc-aug-cc-pCVQZ on Mg and the unc-aug-cc-pVDZ basis on He.

| $n(\text{He})/\text{cm}^{-3}$ | $B = 0$                     | $B \neq 0$                      |                                 |                                        |
|-------------------------------|-----------------------------|---------------------------------|---------------------------------|----------------------------------------|
|                               | $\Delta\lambda/\text{\AA}$  | $\Delta\lambda(E')/\text{\AA}$  | $\Delta\lambda(A')/\text{\AA}$  | $\Delta E_{\text{exc}}(E')/\text{\AA}$ |
| $1.94 \times 10^{21}$         | 6.23                        | 4.70                            | 5.38                            | 6.25                                   |
| $4.12 \times 10^{21}$         | 100.62                      | 81.60                           | 93.31                           | 108.26                                 |
| $6.55 \times 10^{21}$         | 305.95                      | 254.96                          | 290.91                          | 336.78                                 |
| $1.13 \times 10^{22}$         | 760.85                      | 649.64                          | 737.79                          | 849.94                                 |
| $2.21 \times 10^{22}$         | 1072.02                     | 936.95                          | 1065.32                         | 1232.01                                |
| $3.30 \times 10^{22}$         | 498.78                      | 422.63                          | 504.33                          | 628.18                                 |
| $n(\text{He})/\text{cm}^{-3}$ | $\Delta E_{\text{exc}}/E_h$ | $\Delta E_{\text{exc}}(E')/E_h$ | $\Delta E_{\text{exc}}(A')/E_h$ | $\Delta E_{\text{exc}}(E')/E_h$        |
| $1.94 \times 10^{21}$         | $1.079 \times 10^{-4}$      | $9.468 \times 10^{-5}$          | $9.468 \times 10^{-5}$          | $9.483 \times 10^{-5}$                 |
| $4.12 \times 10^{21}$         | $1.776 \times 10^{-3}$      | $1.672 \times 10^{-3}$          | $1.671 \times 10^{-3}$          | $1.674 \times 10^{-3}$                 |
| $6.55 \times 10^{21}$         | $5.631 \times 10^{-3}$      | $5.424 \times 10^{-3}$          | $5.425 \times 10^{-3}$          | $5.439 \times 10^{-3}$                 |
| $1.13 \times 10^{22}$         | $1.546 \times 10^{-2}$      | $1.515 \times 10^{-2}$          | $1.517 \times 10^{-2}$          | $1.525 \times 10^{-2}$                 |
| $2.21 \times 10^{22}$         | $2.345 \times 10^{-2}$      | $2.349 \times 10^{-2}$          | $2.369 \times 10^{-2}$          | $2.409 \times 10^{-2}$                 |
| $3.30 \times 10^{22}$         | $9.561 \times 10^{-3}$      | $9.338 \times 10^{-3}$          | $9.843 \times 10^{-3}$          | $1.075 \times 10^{-2}$                 |

Table S10: Shift in the transition wavelength and energies  $\Delta\lambda = \lambda(\rho \rightarrow 0) - \lambda(\rho)$  ( $\Delta E_{\text{exc}} = E_{\text{exc}}(\rho \rightarrow 0) - E_{\text{exc}}(\rho)$ ) on CD-CCSD ( $\delta = 5$ ) level of the Mg triplet transition as a function of the helium density  $\rho$  of the MgHe<sub>12</sub> ( $C_{3h}$ ) atmospheric model system in a magnetic field of 30000 T oriented along the  $C_3$  axis. Employing the unc-aug-cc-pCVQZ on Mg and the unc-aug-cc-pVDZ basis on He.

| $n(\text{He})/\text{cm}^{-3}$ | $B = 0$                     | $B \neq 0$                      |                                 |                                        |
|-------------------------------|-----------------------------|---------------------------------|---------------------------------|----------------------------------------|
|                               | $\Delta\lambda/\text{\AA}$  | $\Delta\lambda(E')/\text{\AA}$  | $\Delta\lambda(A')/\text{\AA}$  | $\Delta E_{\text{exc}}(E')/\text{\AA}$ |
| $1.94 \times 10^{21}$         | 6.23                        | -0.45                           | -0.82                           | -5.76                                  |
| $4.12 \times 10^{21}$         | 100.62                      | -1.33                           | -2.49                           | -17.13                                 |
| $6.55 \times 10^{21}$         | 305.95                      | 7.97                            | 14.86                           | 103.53                                 |
| $1.13 \times 10^{22}$         | 760.85                      | 60.97                           | 111.48                          | 774.58                                 |
| $2.21 \times 10^{22}$         | 1072.02                     | 182.98                          | 324.98                          | 2288.37                                |
| $3.30 \times 10^{22}$         | 498.78                      | 261.29                          | 474.09                          | 2404.29                                |
| $n(\text{He})/\text{cm}^{-3}$ | $\Delta E_{\text{exc}}/E_h$ | $\Delta E_{\text{exc}}(E')/E_h$ | $\Delta E_{\text{exc}}(A')/E_h$ | $\Delta E_{\text{exc}}(E')/E_h$        |
| $1.94 \times 10^{21}$         | $1.079 \times 10^{-4}$      | $-3.073 \times 10^{-5}$         | $-2.949 \times 10^{-5}$         | $-3.059 \times 10^{-5}$                |
| $4.12 \times 10^{21}$         | $1.776 \times 10^{-3}$      | $-9.098 \times 10^{-5}$         | $-8.897 \times 10^{-5}$         | $-9.083 \times 10^{-5}$                |
| $6.55 \times 10^{21}$         | $5.631 \times 10^{-3}$      | $5.477 \times 10^{-4}$          | $5.338 \times 10^{-4}$          | $5.561 \times 10^{-4}$                 |
| $1.13 \times 10^{22}$         | $1.546 \times 10^{-2}$      | $4.279 \times 10^{-3}$          | $4.117 \times 10^{-3}$          | $4.489 \times 10^{-3}$                 |
| $2.21 \times 10^{22}$         | $2.345 \times 10^{-2}$      | $1.350 \times 10^{-2}$          | $1.279 \times 10^{-2}$          | $1.614 \times 10^{-2}$                 |
| $3.30 \times 10^{22}$         | $9.561 \times 10^{-3}$      | $1.992 \times 10^{-2}$          | $1.956 \times 10^{-2}$          | $1.725 \times 10^{-2}$                 |

Table S11: Transition wavelength and transition dipole moments  $|\mu_{IJ}|^2$  on CD-CCSD ( $\delta = 5$ ) level of the Mg triplet transition as a function of the helium density  $\rho$  of the MgHe<sub>12</sub> ( $C_{3h}$ ) atmospheric model system in a magnetic field of 3000 T oriented along the  $C_3$  axis. Employing the unc-aug-cc-pCVQZ on Mg and the unc-aug-cc-pVDZ basis on He.

| $n(\text{He})/\text{cm}^{-3}$ | $\Delta\lambda(E')/\text{\AA}$ | $ \mu_{IJ} ^2/e^2a_0^2$ | $\Delta\lambda(A')/\text{\AA}$ | $ \mu_{IJ} ^2/e^2a_0^2$ | $\Delta\lambda(E')/\text{\AA}$ | $ \mu_{IJ} ^2/e^2a_0^2$ |
|-------------------------------|--------------------------------|-------------------------|--------------------------------|-------------------------|--------------------------------|-------------------------|
| $1.94 \times 10^{21}$         | 4753.81                        | 2.34                    | 5086.34                        | 2.37                    | 5477.70                        | 2.31                    |
| $4.12 \times 10^{21}$         | 4676.90                        | 2.37                    | 4998.41                        | 2.41                    | 5375.69                        | 2.36                    |
| $6.55 \times 10^{21}$         | 4503.55                        | 2.36                    | 4800.81                        | 2.39                    | 5147.17                        | 2.35                    |
| $1.13 \times 10^{22}$         | 4108.86                        | 2.07                    | 4353.93                        | 2.10                    | 4634.01                        | 2.09                    |
| $2.21 \times 10^{22}$         | 3821.56                        | 0.77                    | 4026.41                        | 0.80                    | 4251.93                        | 0.82                    |
| $3.30 \times 10^{22}$         | 4335.88                        | 0.00                    | 4587.39                        | 0.00                    | 4855.77                        | 0.05                    |

Table S12: EOM-CC2 excitation energy of the MgHe<sub>12</sub> and MgHe<sub>56</sub> cluster using a lattice constant of 3  $\text{\AA}$  which equates to a density of  $6.5 \times 10^{21}$  atoms/cm<sup>3</sup>. A magnetic field of 3000 T was oriented along the  $C_3$  axis. The basis set on Mg was chosen to be unc-aug-cc-pCVQZ while the basis on He was unc-aug-cc-pVDZ.

|                    | $n(\text{He})/\text{cm}^{-3}$ | $E'$                          |                      | $A'$                          |                      | $E'$                          |                      |
|--------------------|-------------------------------|-------------------------------|----------------------|-------------------------------|----------------------|-------------------------------|----------------------|
|                    |                               | $E_{\text{exc}}/E_{\text{h}}$ | $\lambda/\text{\AA}$ | $E_{\text{exc}}/E_{\text{h}}$ | $\lambda/\text{\AA}$ | $E_{\text{exc}}/E_{\text{h}}$ | $\lambda/\text{\AA}$ |
| MgHe <sub>12</sub> | $6.5 \times 10^{21}$          | 0.101694                      | 4482.82              | 0.094735                      | 4812.14              | 0.090007                      | 5064.90              |
| MgHe <sub>56</sub> | $6.5 \times 10^{21}$          | 0.101820                      | 4477.29              | 0.094861                      | 4805.75              | 0.090132                      | 5057.89              |
| Difference         |                               |                               | 5.54                 |                               | 6.39                 |                               | 7.01                 |

Table S13: Equilibrium geometries of the MgHe dimer in the triplet state as a function of the magnetic field strength.

| $B/B_0$ | parallel                   | perpendicular              |
|---------|----------------------------|----------------------------|
|         | $R_{\text{eq}}/\text{\AA}$ | $R_{\text{eq}}/\text{\AA}$ |
| 0       | 4.0744                     | 4.0744                     |
| 0.05    | 4.0961                     | 6.2495                     |
| 0.1     | 4.1414                     | 5.3340                     |
| 0.15    | 4.2000                     | 4.6164                     |
| 0.2     | 4.2677                     | 4.0531                     |

Table S14: Transition wavelength  $\lambda$  ( ${}^3\Pi({}^3A') \rightarrow {}^3\Sigma^+({}^3A')$  and  ${}^3\Sigma^+({}^3A'') \rightarrow {}^3\Sigma^+(A')$ ) as well as the total initial and final state energy  $E_{\text{tot}}$  as a function of the Mg-He distance  $R$  in a parallel and perpendicular magnetic field of 3000 T. Calculated at the CD-CCSD ( $\delta = 5$ ) level using the unc-aug-cc-pCVQZ basis for Mg and the unc-aug-cc-pVDZ basis for He. The data is visualized in Fig. S6 and S7.

| $R/\text{\AA}$ | $E_{\text{tot}}({}^3\Pi)/E_{\text{h}}$ | $\lambda/\text{\AA}$ | $E_{\text{tot}}({}^3\Sigma)/E_{\text{h}}$ | $\lambda/\text{\AA}$ | $E_{\text{tot}}^{\text{final}}({}^3\Sigma)/E_{\text{h}}$ |
|----------------|----------------------------------------|----------------------|-------------------------------------------|----------------------|----------------------------------------------------------|
| 2.5            | -202.826805                            | 4732.17              | -202.797340                               | 6817.37              | -202.730470                                              |
| 3.0            | -202.828475                            | 4675.23              | -202.811941                               | 5629.83              | -202.730966                                              |
| 3.5            | -202.828911                            | 4661.70              | -202.818385                               | 5224.00              | -202.731119                                              |
| 4.0            | -202.828967                            | 4671.00              | -202.821016                               | 5085.29              | -202.731370                                              |
| 4.5            | -202.828940                            | 4689.36              | -202.822035                               | 5047.88              | -202.731725                                              |
| 5.0            | -202.828907                            | 4708.75              | -202.822409                               | 5047.54              | -202.732092                                              |
| 5.5            | -202.828885                            | 4725.25              | -202.822538                               | 5057.99              | -202.732408                                              |
| 6.0            | -202.828873                            | 4737.58              | -202.822580                               | 5069.11              | -202.732647                                              |
| 6.5            | -202.828866                            | 4746.01              | -202.822591                               | 5077.75              | -202.732811                                              |
| 7.0            | -202.828862                            | 4751.39              | -202.822593                               | 5083.59              | -202.732916                                              |
| 7.5            | -202.828860                            | 4754.63              | -202.822592                               | 5087.23              | -202.732980                                              |
| 8.0            | -202.828859                            | 4756.50              | -202.822591                               | 5089.36              | -202.733016                                              |
| 8.5            | -202.828858                            | 4757.53              | -202.822590                               | 5090.55              | -202.733036                                              |
| 9.0            | -202.828858                            | 4758.08              | -202.822589                               | 5091.19              | -202.733047                                              |
| 9.5            | -202.828857                            | 4758.35              | -202.822588                               | 5091.51              | -202.733052                                              |
| 10.0           | -202.828857                            | 4758.48              | -202.822588                               | 5091.66              | -202.733054                                              |
| $R/\text{\AA}$ | $E_{\text{tot}}({}^3A')/E_{\text{h}}$  | $\lambda/\text{\AA}$ | $E_{\text{tot}}({}^3A'')/E_{\text{h}}$    | $\lambda/\text{\AA}$ | $E_{\text{tot}}^{\text{final}}({}^3A')/E_{\text{h}}$     |
| 2.5            | -202.821858                            | 4995.41              | -202.820610                               | 5064.69              | -202.730599                                              |
| 3.0            | -202.825005                            | 4855.57              | -202.822181                               | 5006.15              | -202.731117                                              |
| 3.5            | -202.827057                            | 4759.41              | -202.822634                               | 4989.83              | -202.731273                                              |
| 4.0            | -202.828154                            | 4716.48              | -202.822696                               | 4998.80              | -202.731498                                              |
| 4.5            | -202.828621                            | 4709.67              | -202.822669                               | 5018.23              | -202.731825                                              |
| 5.0            | -202.828791                            | 4718.12              | -202.822637                               | 5039.08              | -202.732169                                              |
| 5.5            | -202.828846                            | 4729.92              | -202.822615                               | 5056.81              | -202.732464                                              |
| 6.0            | -202.828861                            | 4740.11              | -202.822603                               | 5069.99              | -202.732687                                              |
| 6.5            | -202.828863                            | 4747.46              | -202.822597                               | 5078.90              | -202.732838                                              |
| 7.0            | -202.828862                            | 4752.22              | -202.822593                               | 5084.51              | -202.732933                                              |
| 7.5            | -202.828861                            | 4755.10              | -202.822591                               | 5087.84              | -202.732990                                              |
| 8.0            | -202.828860                            | 4756.75              | -202.822590                               | 5089.73              | -202.733022                                              |
| 8.5            | -202.828859                            | 4757.65              | -202.822589                               | 5090.76              | -202.733039                                              |
| 9.0            | -202.828858                            | 4758.13              | -202.822588                               | 5091.29              | -202.733048                                              |
| 9.5            | -202.828948                            | 4753.91              | -202.822588                               | 5091.56              | -202.733052                                              |
| 10.0           | -202.828739                            | 4761.76              | -202.822698                               | 5082.48              | -202.733002                                              |

Table S15: Transition wavelength  $\lambda$  ( ${}^3\Pi({}^3A') \rightarrow {}^3\Sigma^+({}^3A')$  and  ${}^3\Sigma^+({}^3A'') \rightarrow {}^3\Sigma^+(A')$ ) as well as the total initial and final state energy  $E_{\text{tot}}$  as a function of the Mg-He distance  $R$  in a parallel and perpendicular magnetic field of 30 000 T. Calculated at the CD-CCSD ( $\delta = 5$ ) level using the unc-aug-cc-pCVQZ basis for Mg and the unc-aug-cc-pVDZ basis for He. The data is visualized in Fig. S6 and S7.

| $R/\text{\AA}$ | $E_{\text{tot}}({}^3\Pi)/E_{\text{h}}$ | $\lambda/\text{\AA}$ | $E_{\text{tot}}({}^3\Sigma)/E_{\text{h}}$ | $\lambda/\text{\AA}$ | $E_{\text{tot}}^{\text{final}}({}^3\Sigma)/E_{\text{h}}$ |
|----------------|----------------------------------------|----------------------|-------------------------------------------|----------------------|----------------------------------------------------------|
| 2.5            | -202.947495                            | 2343.97              | -202.873824                               | 3773.26              | -202.753006                                              |
| 3.0            | -202.949306                            | 2345.80              | -202.889685                               | 3383.98              | -202.754968                                              |
| 3.5            | -202.949803                            | 2393.12              | -202.896516                               | 3322.54              | -202.759308                                              |
| 4.0            | -202.949880                            | 2444.26              | -202.899241                               | 3355.24              | -202.763371                                              |
| 4.5            | -202.949860                            | 2491.57              | -202.900268                               | 3418.00              | -202.766893                                              |
| 5.0            | -202.949830                            | 2530.75              | -202.900627                               | 3481.79              | -202.769695                                              |
| 5.5            | -202.949809                            | 2559.00              | -202.900738                               | 3531.84              | -202.771662                                              |
| 6.0            | -202.949797                            | 2575.64              | -202.900764                               | 3562.56              | -202.772801                                              |
| 6.5            | -202.949790                            | 2582.69              | -202.900764                               | 3575.88              | -202.773277                                              |
| 7.0            | -202.949786                            | 2583.86              | -202.900759                               | 3578.16              | -202.773354                                              |
| 7.5            | -202.949784                            | 2582.67              | -202.900755                               | 3575.94              | -202.773270                                              |
| 8.0            | -202.949783                            | 2581.23              | -202.900752                               | 3573.21              | -202.773171                                              |
| 8.5            | -202.949782                            | 2580.25              | -202.900751                               | 3571.37              | -202.773103                                              |
| 9.0            | -202.949782                            | 2579.75              | -202.900750                               | 3570.41              | -202.773068                                              |
| 9.5            | -202.949782                            | 2579.52              | -202.900749                               | 3569.99              | -202.773053                                              |
| 10.0           | -202.949781                            | 2579.43              | -202.900749                               | 3569.83              | -202.773046                                              |
| $R/\text{\AA}$ | $E_{\text{tot}}({}^3A')/E_{\text{h}}$  | $\lambda/\text{\AA}$ | $E_{\text{tot}}({}^3A'')/E_{\text{h}}$    | $\lambda/\text{\AA}$ | $E_{\text{tot}}^{\text{final}}({}^3A')/E_{\text{h}}$     |
| 2.5            | -202.938595                            | 2749.69              | -202.899984                               | 3584.45              | -202.772803                                              |
| 3.0            | -202.946127                            | 2637.73              | -202.900899                               | 3572.69              | -202.773298                                              |
| 3.5            | -202.948867                            | 2597.06              | -202.900982                               | 3571.27              | -202.773331                                              |
| 4.0            | -202.949652                            | 2584.27              | -202.900899                               | 3571.25              | -202.773247                                              |
| 4.5            | -202.949815                            | 2580.72              | -202.900830                               | 3570.98              | -202.773168                                              |
| 5.0            | -202.949824                            | 2579.79              | -202.900791                               | 3570.52              | -202.773113                                              |
| 5.5            | -202.949809                            | 2579.55              | -202.900771                               | 3570.21              | -202.773082                                              |
| 6.0            | -202.949797                            | 2579.51              | -202.900761                               | 3570.07              | -202.773067                                              |
| 6.5            | -202.949791                            | 2579.50              | -202.900756                               | 3570.01              | -202.773060                                              |
| 7.0            | -202.949787                            | 2579.48              | -202.900753                               | 3569.95              | -202.773055                                              |
| 7.5            | -202.949785                            | 2579.45              | -202.900751                               | 3569.88              | -202.773051                                              |
| 8.0            | -202.949783                            | 2579.42              | -202.900750                               | 3569.82              | -202.773047                                              |
| 8.5            | -202.949783                            | 2579.40              | -202.900750                               | 3569.78              | -202.773045                                              |
| 9.0            | -202.949782                            | 2579.39              | -202.900749                               | 3569.74              | -202.773044                                              |
| 9.5            | -202.949782                            | 2579.38              | -202.900749                               | 3569.73              | -202.773043                                              |
| 10.0           | -202.949781                            | 2579.37              | -202.900749                               | 3569.72              | -202.773042                                              |

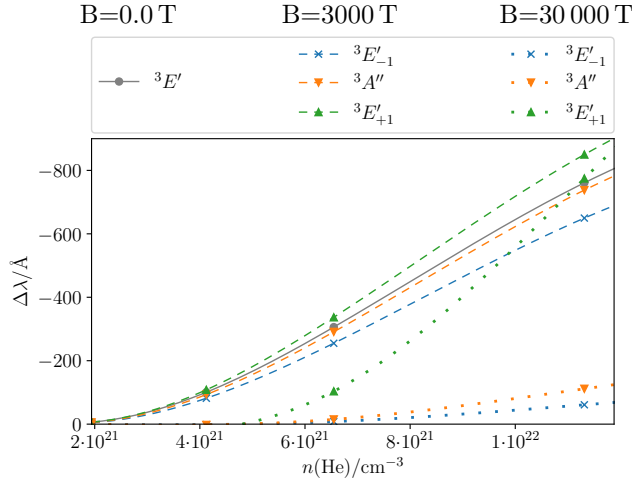

Figure S4: Shift in the transition wavelength  $\Delta\lambda$  with respect atomic transition for triplet Mg as a function of the helium density  $\rho$  of the  $\text{MgHe}_{12}$  ( $C_{3h}$ ) atmospheric model system for the field-free case (grey full curve) and in a magnetic fields of 3000 T (dashed curves) as well as 30 000 T (dotted curves) oriented along the  $C_3$  axis. Calculated at the CD-CCSD ( $\delta = 5$ ) level employing the unc-aug-cc-pCVQZ on Mg and the unc-aug-cc-pVDZ basis on He.

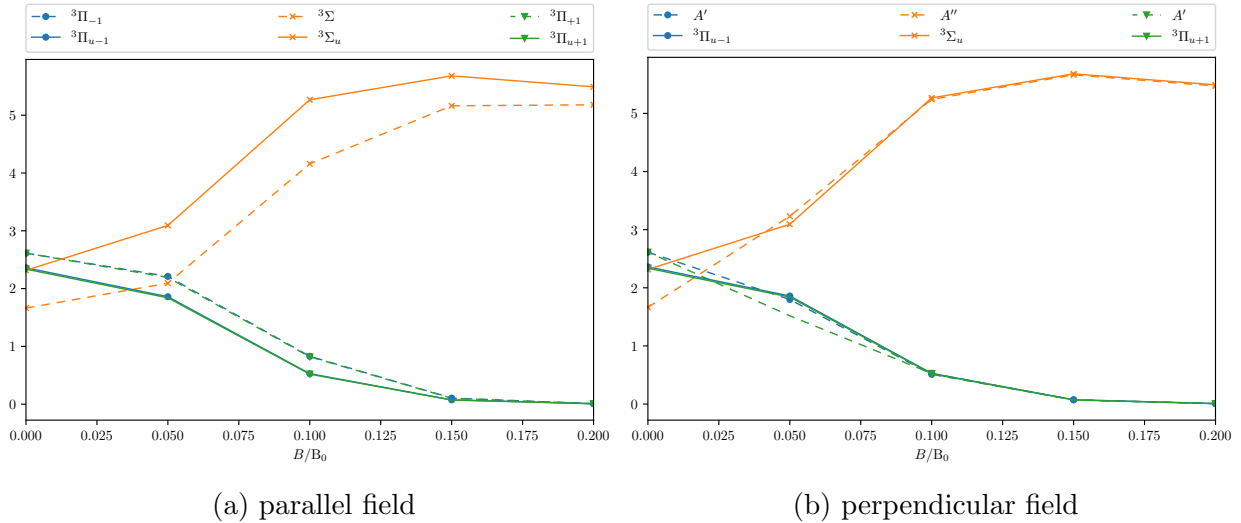

Figure S5: Evolution of the transition-dipole moment of the transitions in the triplet MgHe dimer as a function of the magnetic field strength (dashed lines). As reference the transition-dipole moment of an isolated atom is plotted (full lines). The calculations were performed using ff-CD-CCSD and the unc-aug-cc-pCVQZ basis for Mg and the unc-aug-cc-pVDZ basis for He.

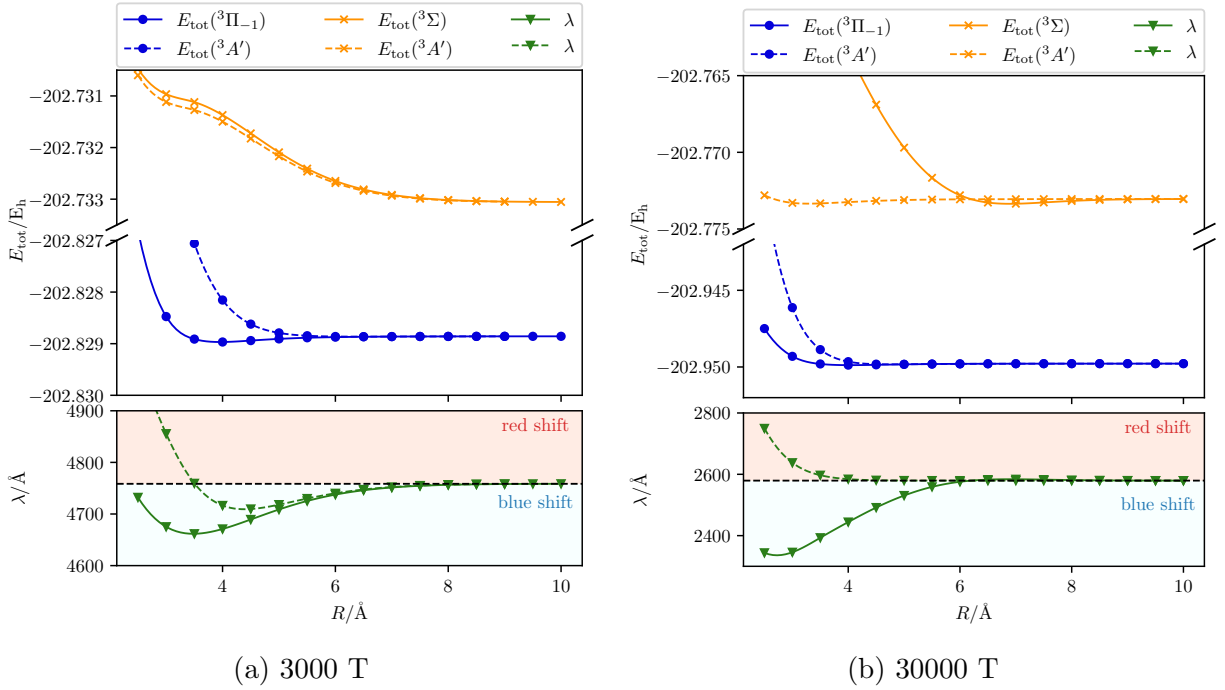

Figure S6: Transition wavelengths  $\lambda$  in a parallel ( ${}^3\Pi_{-1} \rightarrow {}^3\Sigma$ , full lines) and perpendicular orientation ( ${}^3A' \rightarrow {}^3A'$ , dashed lines) in a magnetic field of 3000 T and 30000 T as well as the total initial-state energy  $E_{\text{tot}}$  as a function of the Mg-He distance  $R$ . Calculated with CD-CCSD ( $\delta = 5$ ) using the unc-aug-cc-pCVQZ basis for Mg and the unc-aug-cc-pVDZ basis for He.

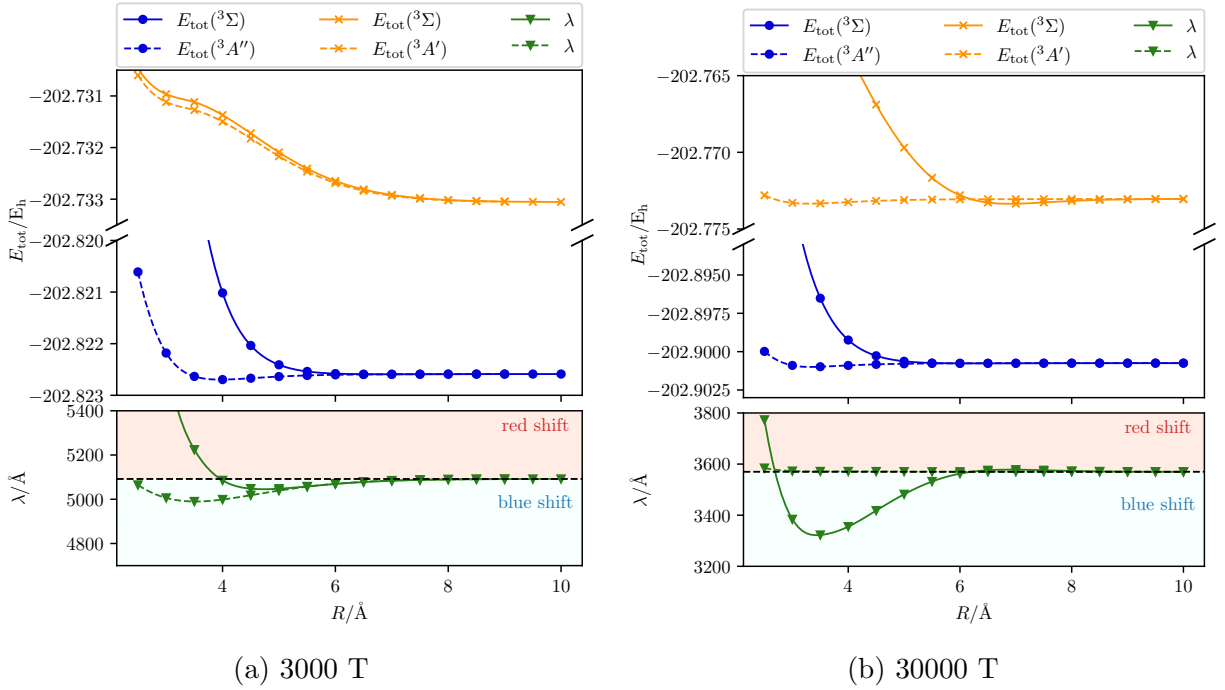

Figure S7: Transition wavelengths  $\lambda$  in a parallel ( ${}^3\Sigma \rightarrow {}^3\Sigma$ , full lines) and perpendicular orientation ( ${}^3A'' \rightarrow {}^3A'$ , dashed lines) in a magnetic field of 3000 T and 30000 T as well as the total initial-state energy  $E_{\text{tot}}$  as a function of the Mg-He distance  $R$ . Calculated with CD-CCSD ( $\delta = 5$ ) using the unc-aug-cc-pCVQZ basis for Mg and the unc-aug-cc-pVDZ basis for He.
